# Supplementary material for: Rapid determination of lead isotopes in water by coupling DGT passive samplers and MC-ICP-MS laser ablation
Source: Royal Society of Chemistry journal article supplement (doi:10.1039/d0ja00121j), 2020-01-01
Supplement: d0ja00121j1.pdf [file d0ja00121j1.pdf]

1     **Rapid determination of lead isotopes in water by coupling DGT**  
2             **passive samplers and MC-ICP-MS laser ablation**

3 **Desaulty Anne-Marie\***, Lach Philippe, Perret Sebastien

4 BRGM, F-45060, Orléans, France

5 \* Corresponding author

6 **Supplementary Material (ESI)**

7

8

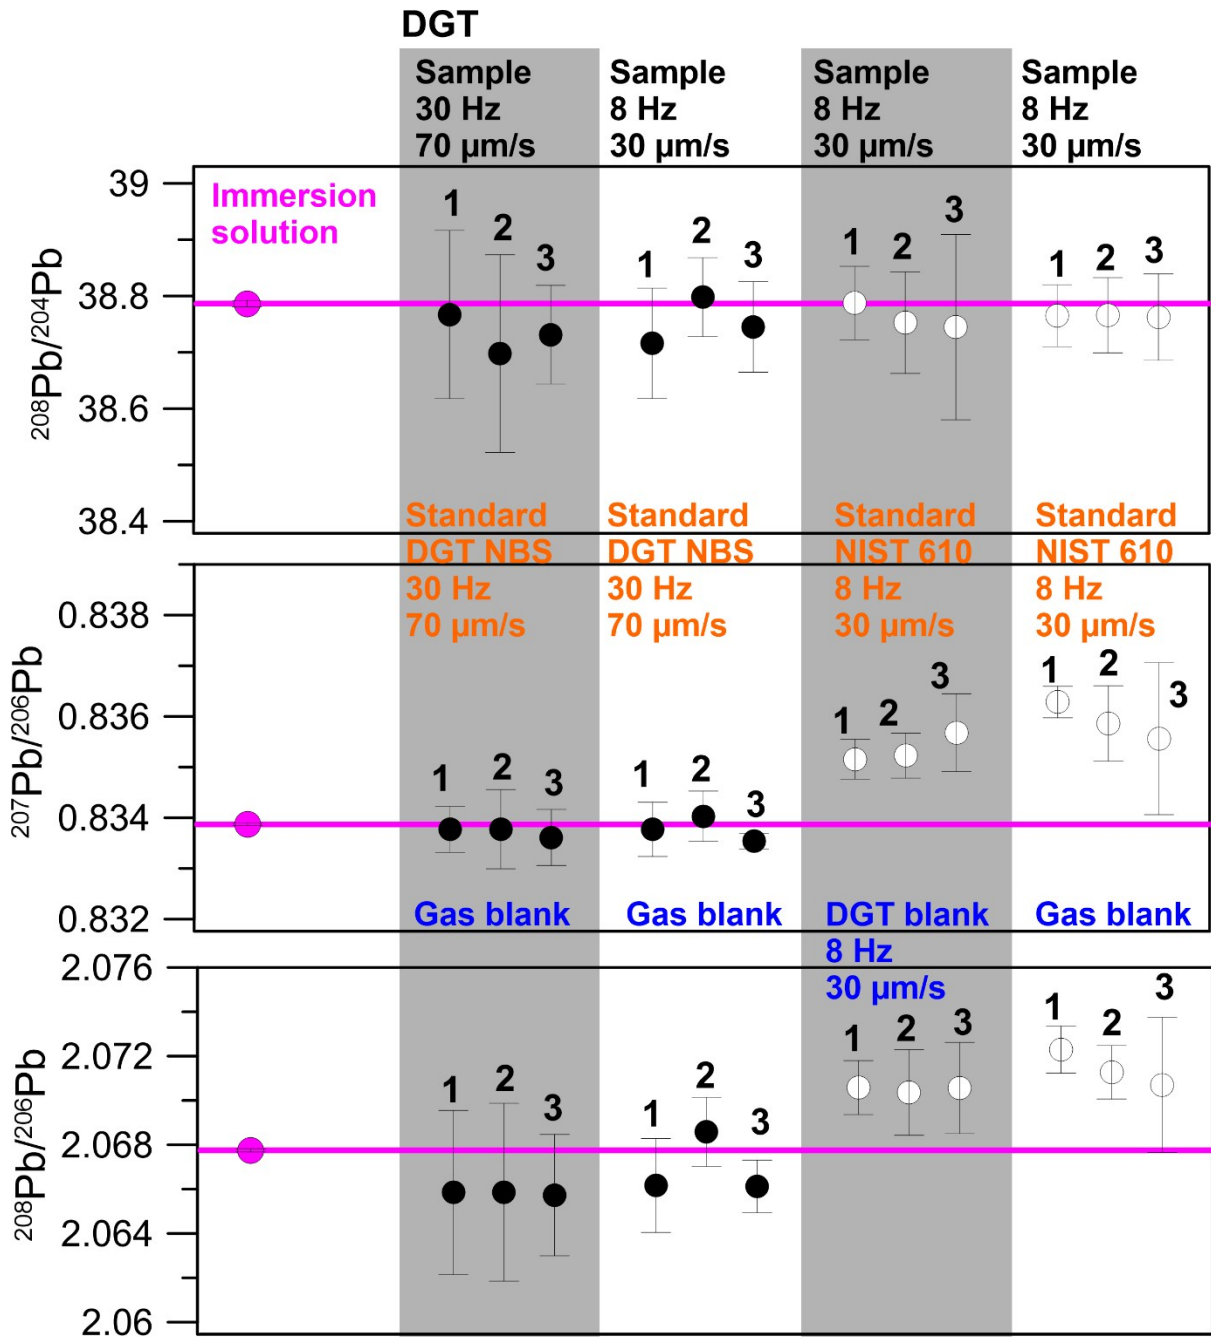

10

11 **Fig.S1** Pb-isotope data for immersion solution analysed by liquid-MC-ICP-MS (pink dots), and  
 12 DGT 1, 2 and 3 analysed by LA-MC-ICP-MS, with various laser-ablation parameters and  
 13 external normalizations (black and white dots).

14

15

(a)

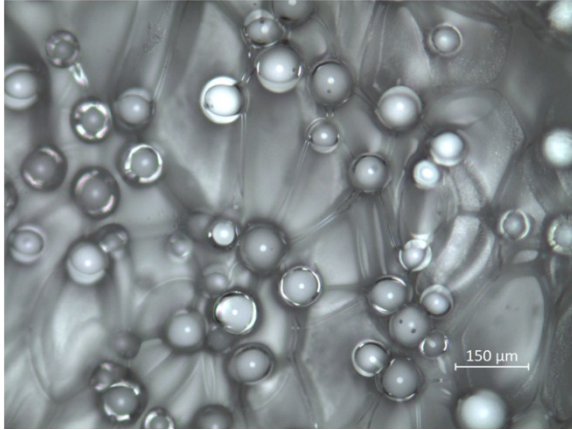

(b)

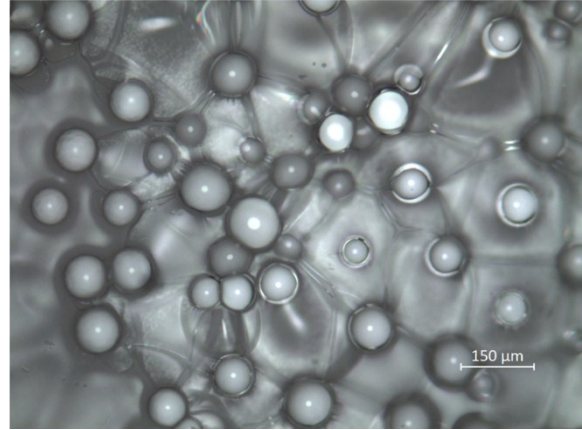

16

17 **Fig.S2** Optical image of: (a) DGT B resin layer and (b) DGT resin layer voluntarily laid on the  
18 wrong face; the hydrogel covers the resin beads in both cases.

19

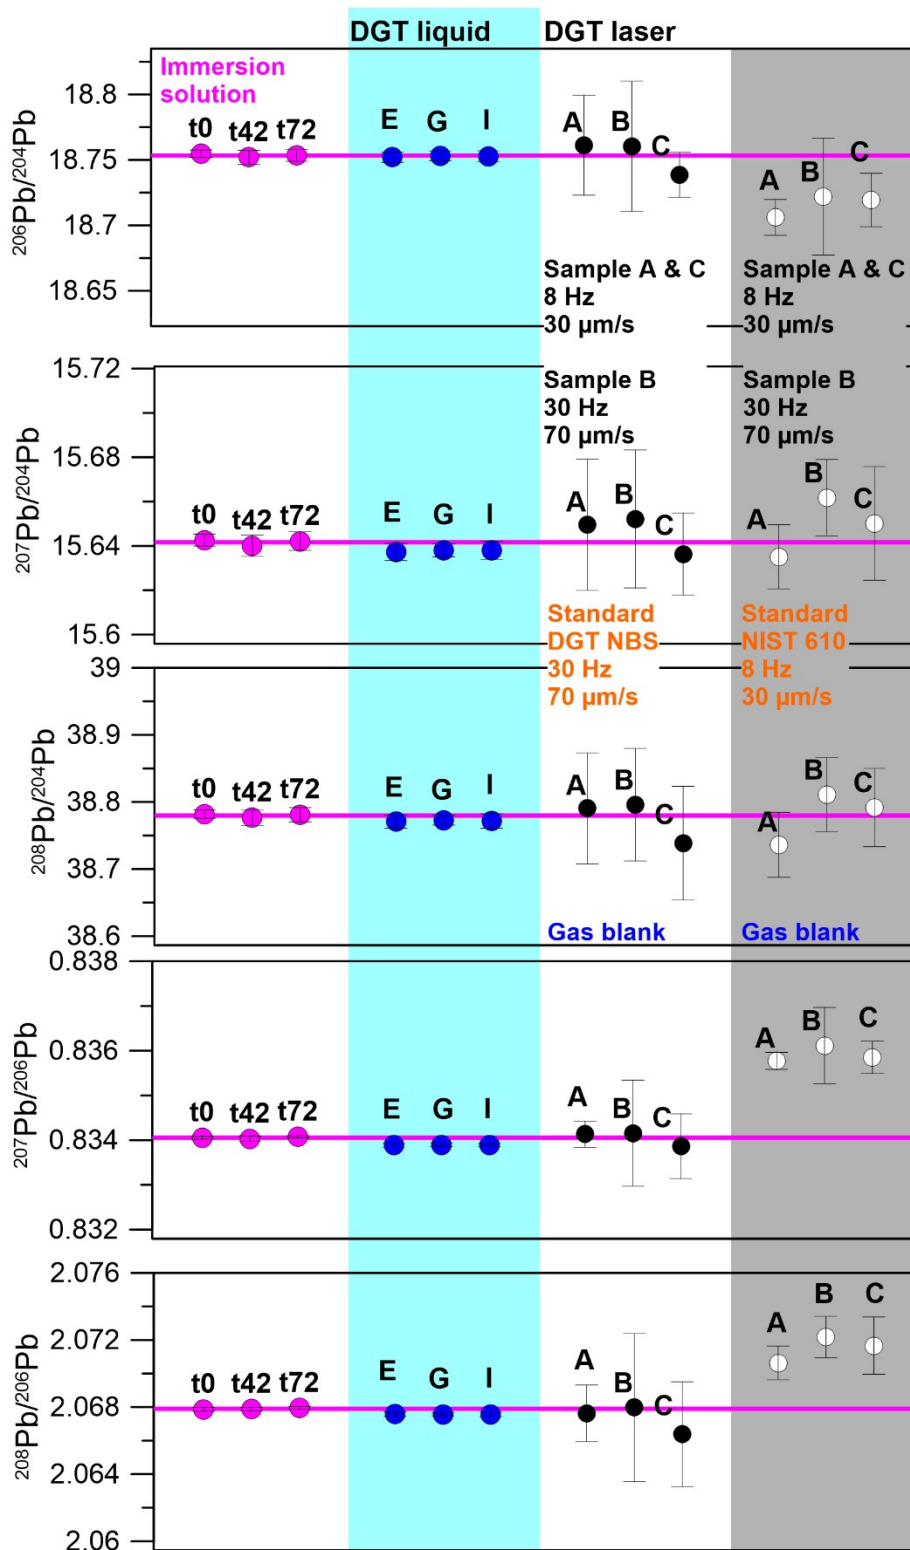

20

21 **Fig.S3** Pb-isotope data for immersion solutions collected at  $t=0$ , 42 and 72 hours and analysed  
 22 by liquid-MC-ICP-MS (pink dots), DGT E, G and I analysed by liquid-MC-ICP-MS (blue dots),  
 23 and DGT A, B and C analysed by LA-MC-ICP-MS, with various laser-ablation parameters and  
 24 external normalizations (black and white dots).
